# Supplementary material for: Longitudinal Symptom Burden Trajectories in a Population-Based Cohort of Women with Metastatic Breast Cancer: A Group-Based Trajectory Modeling Analysis
Source: MDPI journal article supplement (doi:10.3390/curroncol28010087), 2021-02-14
Supplement: s1 [file s1]

## Total Symptom Distress Score Trajectories over Time (95% CI)

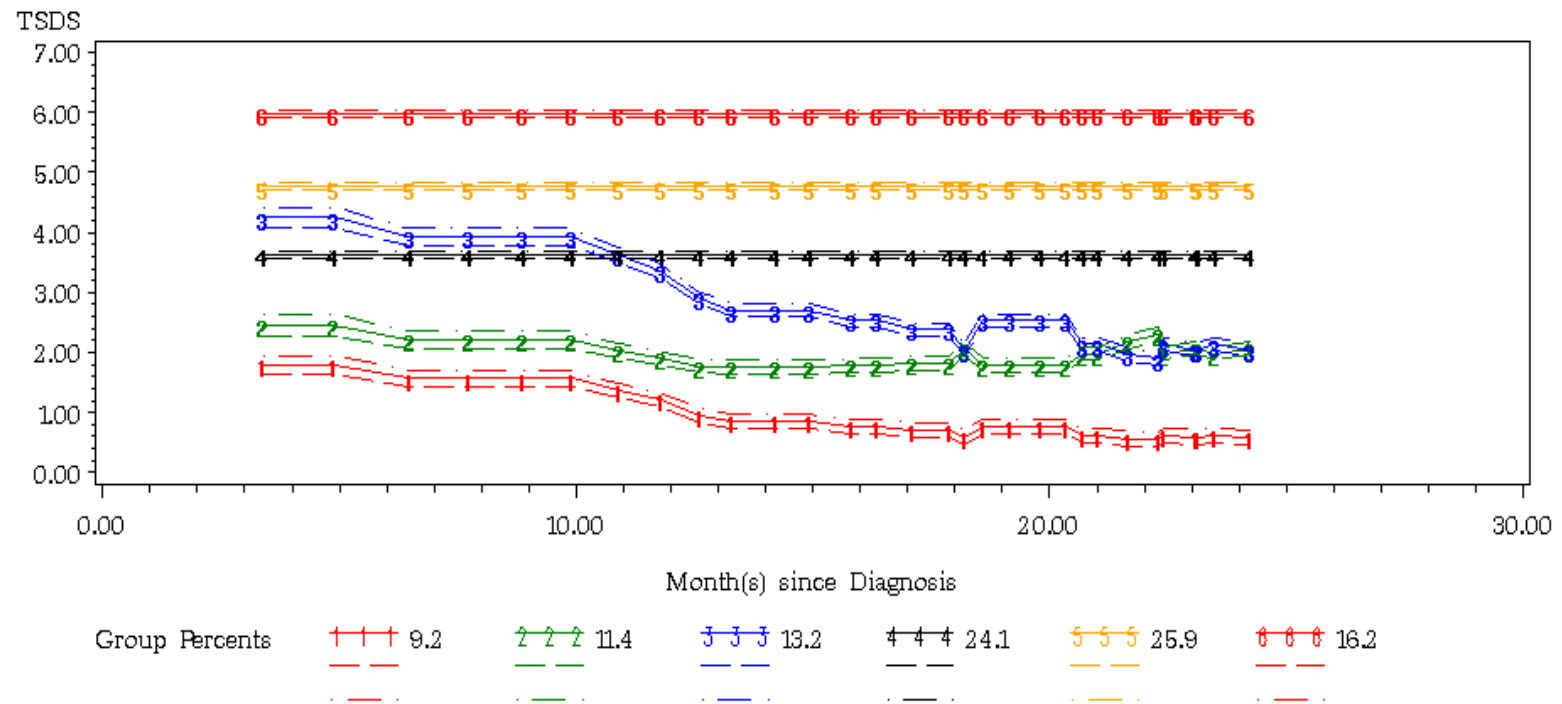

Supplementary Figure 1: Total Symptom Distress Score (TSDS)\* group trajectories over time with 95% Confidence Intervals. \*Transformed values are reported. Magnitude of TSDS differences within group trajectories are relative, and not absolute values.
